# Supplementary material for: The Catalytic Role of Superparamagnetic Iron Oxide Nanoparticles as a Support Material for TiO2 and ZnO on Chlorpyrifos Photodegradation in an Aqueous Solution
Source: MDPI journal article supplement (doi:10.3390/nano14030299), 2024-02-01
Supplement: s1 [file s1]

Supplementary information

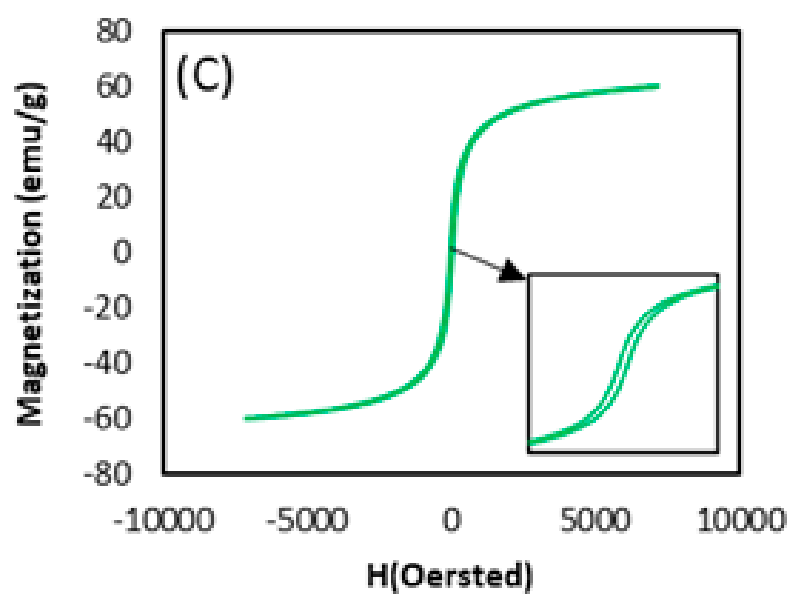

**Figure S1.** Hysteresis loop of Fe<sub>3</sub>O<sub>4</sub> NP and inset at 0 Oe obtained by VSD.

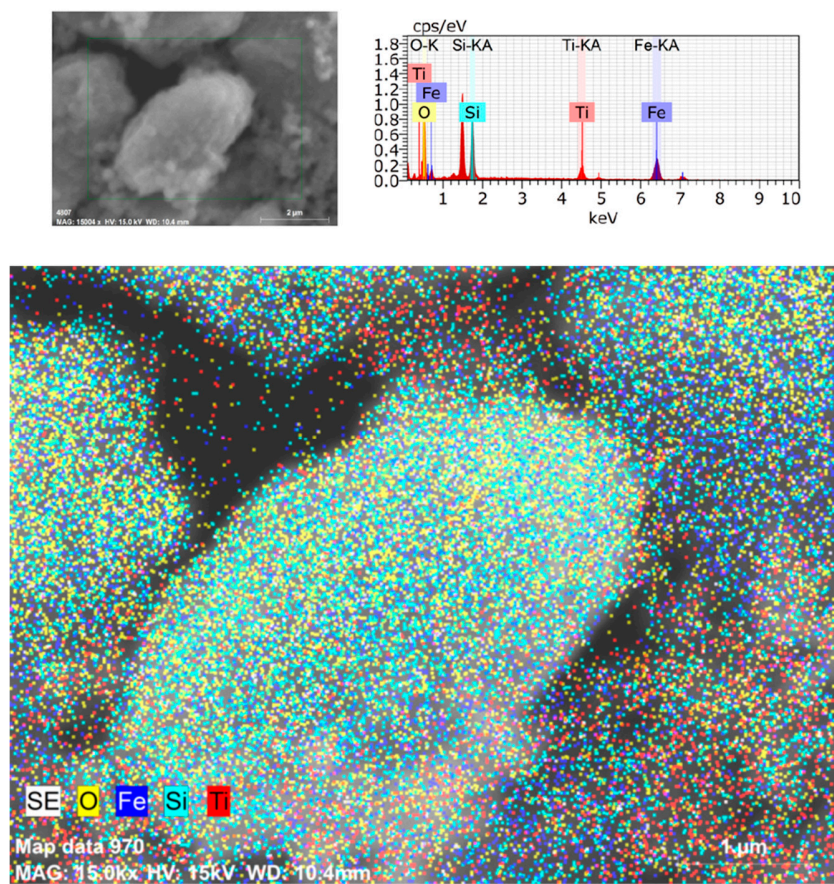

Figure S2. Energy-dispersive X-ray spectroscopy of  $\text{Fe}_3\text{O}_4@\text{SiO}_2@\text{TiO}_2$

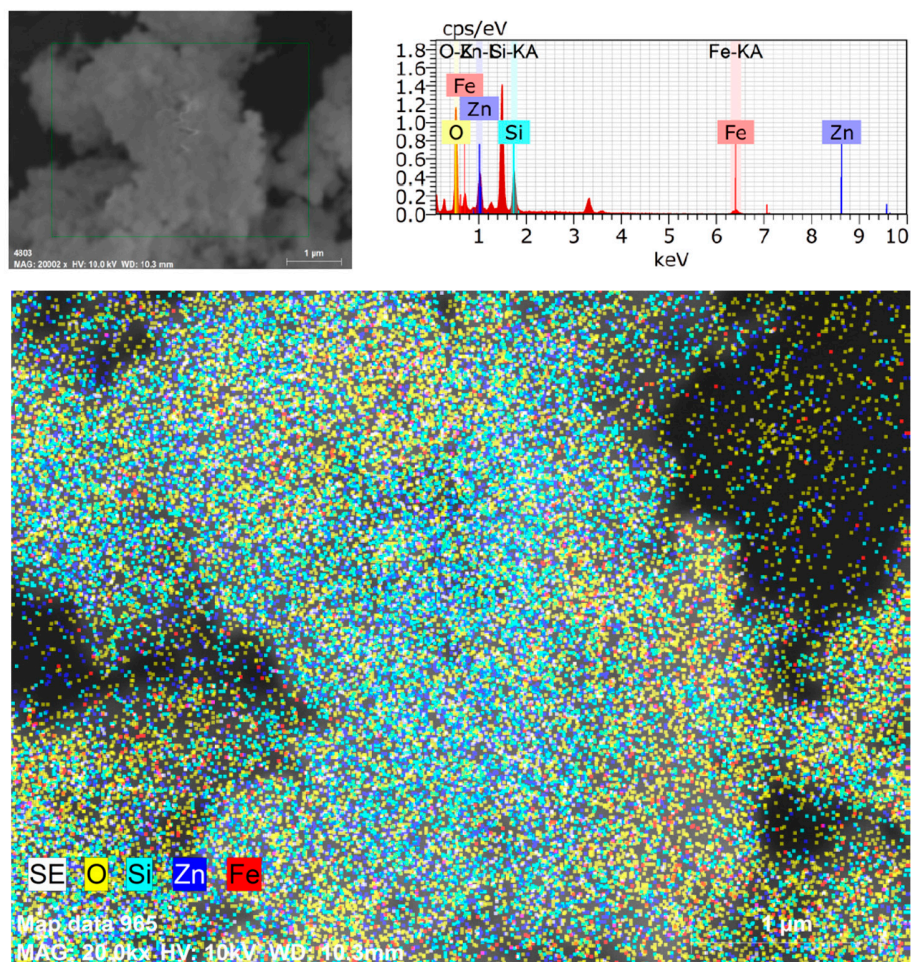

Figure S3. Energy-dispersive X-ray spectroscopy of  $\text{Fe}_3\text{O}_4@\text{SiO}_2@\text{ZnO}$

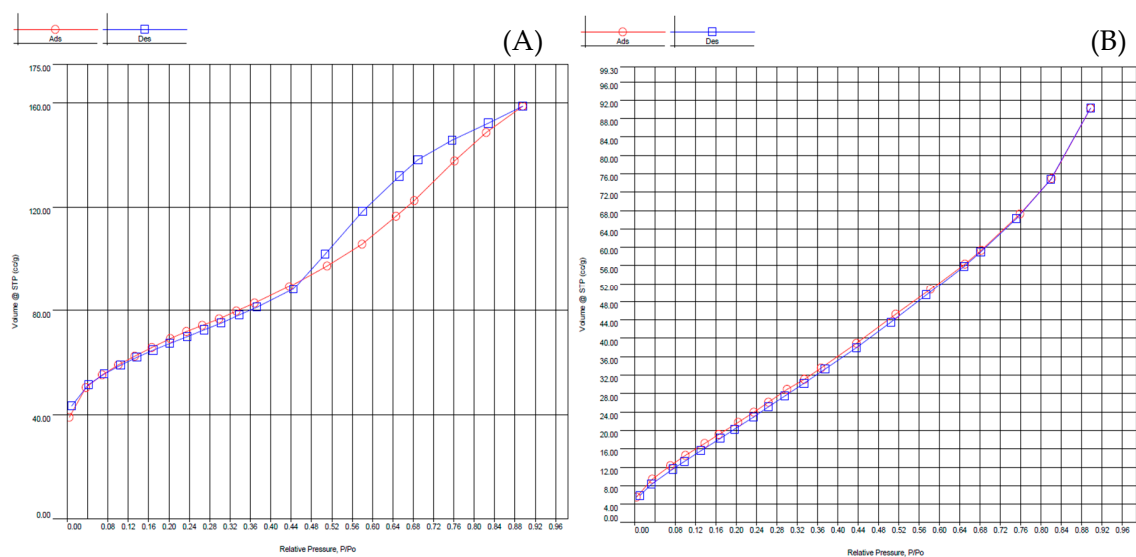

Figure S4. N<sub>2</sub> adsorption-desorption isotherms of synthesized nanocomposites. (A) SPION@SiO<sub>2</sub>@TiO<sub>2</sub>, (B) SPION@SiO<sub>2</sub>@ZnO
